# Supplementary material for: Fractional flow reserve versus angiography for guiding percutaneous coronary intervention: a meta-analysis
Source: HighWire-hosted journal article supplement (doi:10.1136/heartjnl-2014-306578), 2015-01-30

Supplementary figure 1. Funnel Plot of Studies Examining the Primary Endpoint

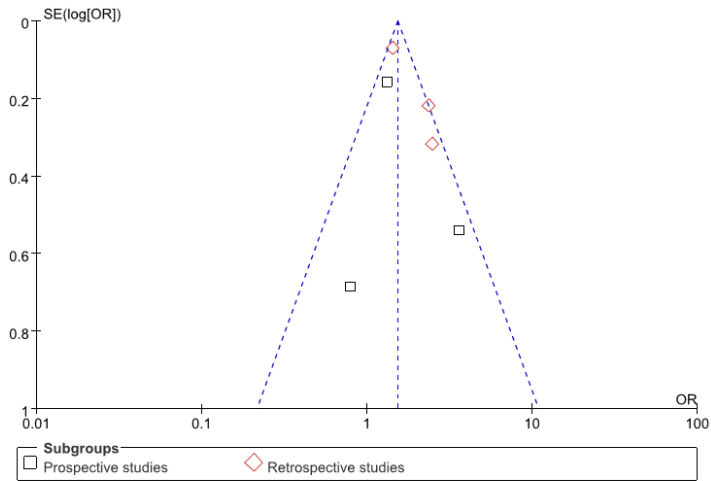

Supplementary figure 2. Sensitivity Analysis

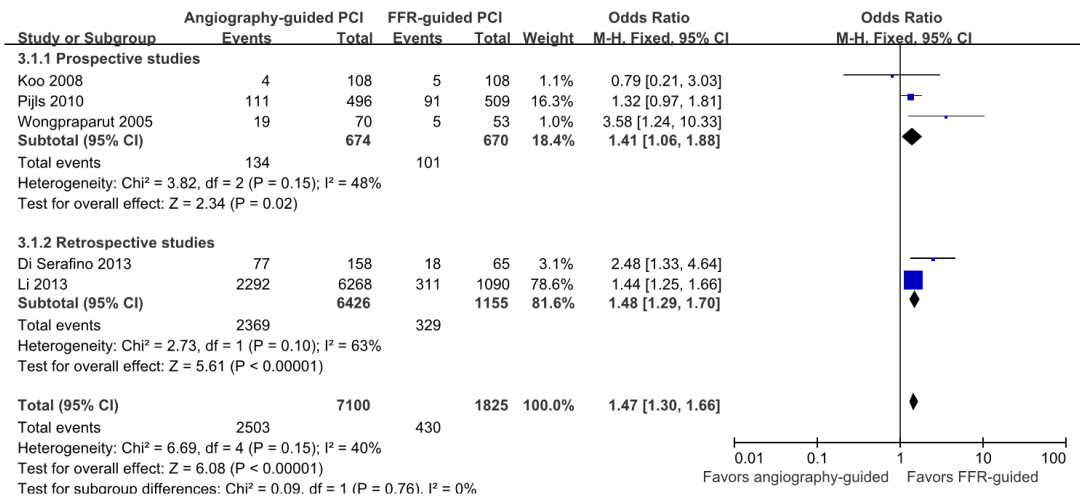

Supplement: heartjnl-2014-306578supp_figures.pdf [file heartjnl-2014-306578supp_figures.pdf]
